# Supplementary material for: Exploiting the Structural Properties of the Underlying Markov Decision Problem in the Q-Learning Algorithm
Source: Atypon-hosted journal article supplement (doi:10.1287/ijoc.1070.0240), 2008-02-26
Supplement: ijoc.1070.0240-sm-kunnumkal_and_topaloglu.pdf [file ijoc.1070.0240-sm-kunnumkal_and_topaloglu.pdf]

# Online Supplement for Exploiting the Structural Properties of the Underlying Markov Decision Problem in the Q-Learning Algorithm

Sumit Kunnunkal, Huseyin Topaloglu

School of Operations Research and Information Engineering, Cornell University, Ithaca, NY 14853, USA,  
 {summit@orie.cornell.edu, topaloglu@orie.cornell.edu}

---

In this document, we prove Lemmas 2 and 5. Our proof of Lemma 2 uses the following generalization of the supermartingale convergence theorem.

**Proposition 7** *Let  $\{X_t\}, \{Y_t\}$  and  $\{Z_t\}$  be sequences of positive random variables adopted to the filtration  $\{\mathcal{G}_t\}$ . Assume that  $\mathbb{E}\{X_{t+1} | \mathcal{G}_t\} \leq X_t - Y_t + Z_t$  for all  $t = 0, 1, \dots$  and  $\sum_{t=0}^{\infty} Z_t < \infty$  w.p.1. Then,  $\{X_t\}$  converges to a positive random variable and we have  $\sum_{t=0}^{\infty} Y_t < \infty$  w.p.1.*

We now prove Lemma 2.

**Proof of Lemma 2** Letting  $R_t$  and  $G_t \in \mathbb{R}^{n \times n}$  be the diagonal matrices whose diagonal components are respectively  $\{\rho_t(i) : i \in \mathcal{S}\}$  and  $\{\gamma_t(i) : i \in \mathcal{S}\}$ , (9) can be written in vector notation as  $\hat{y}_t = y_t + R_t G_t [y^* + \theta_t - y_t]$ . By the nonexpansiveness of the projection operator  $\Pi^{L,U}$ , we have

$$\begin{aligned} \|y_{t+1} - y^*\|_2^2 &\leq \|\hat{y}_t - y^*\|_2^2 = \|y_t - y^*\|_2^2 - 2\langle y_t - y^*, R_t G_t [y_t - y^*] \rangle + 2\langle y_t - y^*, R_t G_t \theta_t \rangle \\ &\quad + \|R_t G_t [y^* + \theta_t - y_t]\|_2^2. \end{aligned} \quad (34)$$

Letting  $P_t$  be the diagonal matrix whose diagonal components are  $\{\mathbb{P}\{i_t = i | \mathcal{G}_t\} : i \in \mathcal{S}\}$ , and noting the fact that  $y_t$  is  $\mathcal{G}_t$ -measurable and  $\mathbb{E}\{\rho_t(i) \gamma_t(i) | \mathcal{G}_t\} = \mathbb{P}\{i_t = i | \mathcal{G}_t\} \gamma_t(i)$ , we have

$$\begin{aligned} \mathbb{E}\{\langle y_t - y^*, R_t G_t [y_t - y^*] \rangle | \mathcal{G}_t\} &= \langle y_t - y^*, \mathbb{E}\{R_t G_t | \mathcal{G}_t\} [y_t - y^*] \rangle \\ &= \langle y_t - y^*, P_t G_t [y_t - y^*] \rangle. \end{aligned} \quad (35)$$

Noting (10) and (14), we have

$$\begin{aligned} \mathbb{E}\{\langle y_t - y^*, R_t G_t \theta_t \rangle | \mathcal{G}_t, i_t\} &= \mathbb{E}\{[y_t(i_t) - y^*(i_t)] \gamma_t(i_t) \theta_t(i_t) | \mathcal{G}_t, i_t\} \\ &= [y_t(i_t) - y^*(i_t)] \gamma_t(i_t) \mathbb{E}\{\theta_t(i_t) | \mathcal{G}_t, i_t\} = 0 \quad \text{w.p.1,} \end{aligned}$$

which implies that

$$\mathbb{E}\{\langle y_t - y^*, R_t G_t \theta_t \rangle | \mathcal{G}_t\} = \mathbb{E}\{\mathbb{E}\{\langle y_t - y^*, R_t G_t \theta_t \rangle | \mathcal{G}_t, i_t\} | \mathcal{G}_t\} = 0 \quad \text{w.p.1.} \quad (36)$$

Since  $y_t$  is the projection of  $\hat{y}_{t-1}$  onto  $\mathcal{P}^{L,U}$ , we have  $y_t \in \mathcal{P}^{L,U}$ . Then, (14), (15) and the fact that  $y^* \in \mathcal{P}^{L,U}$  imply that

$$\begin{aligned} \mathbb{E}\{\|R_t G_t [y^* + \theta_t - y_t]\|_2^2 | \mathcal{G}_t, i_t\} &= \mathbb{E}\{\|R_t G_t [y^* - y_t]\|_2^2 | \mathcal{G}_t, i_t\} \\ &\quad + 2\mathbb{E}\{\langle R_t G_t [y^* - y_t], R_t G_t \theta_t \rangle | \mathcal{G}_t, i_t\} + \mathbb{E}\{\|R_t G_t \theta_t\|_2^2 | \mathcal{G}_t, i_t\} \\ &= [\gamma_t(i_t)]^2 [y^*(i_t) - y_t(i_t)]^2 + 2[\gamma_t(i_t)]^2 [y^*(i_t) - y_t(i_t)] \mathbb{E}\{\theta_t(i_t) | \mathcal{G}_t, i_t\} + [\gamma_t(i_t)]^2 \mathbb{E}\{\|\theta_t(i_t)\|_2^2 | \mathcal{G}_t, i_t\} \\ &\leq [\gamma_t(i_t)]^2 \{4[|L| \vee |U|]^2 + A\} \quad \text{w.p.1,} \end{aligned}$$

where we use  $a \vee b = \max\{a, b\}$ . Taking the expectation of the expression above conditional on  $\mathcal{G}_t$ , we have

$$\mathbb{E}\{\|R_t G_t [y^* + \theta_t - y_t]\|_2^2 | \mathcal{G}_t\} \leq \mathbb{E}\{[\gamma_t(i_t)]^2 | \mathcal{G}_t\} \{4[|L| \vee |U|]^2 + A\} \quad \text{w.p.1.} \quad (37)$$

Taking the expectation of (34) conditional on  $\mathcal{G}_t$  and using (35)-(37), we obtain

$$\begin{aligned} \mathbb{E}\{\|y_{t+1} - y^*\|_2^2 | \mathcal{G}_t\} \\ \leq \|y_t - y^*\|_2^2 - 2\langle y_t - y^*, P_t G_t [y_t - y^*] \rangle + \mathbb{E}\{[\gamma_t(i_t)]^2 | \mathcal{G}_t\} \{4[|L| \vee |U|]^2 + A\}. \end{aligned} \quad (38)$$

On the other hand, using (13) and appealing to the monotone convergence theorem, we have

$$\begin{aligned} \mathbb{E}\left\{\sum_{t=0}^{\infty} \mathbb{E}\{[\gamma_t(i_t)]^2 | \mathcal{G}_t\}\right\} &= \sum_{t=0}^{\infty} \mathbb{E}\{[\gamma_t(i_t)]^2\} \\ &= \sum_{t=0}^{\infty} \mathbb{E}\left\{\sum_{i=1}^n \rho_t(i) [\gamma_t(i)]^2\right\} = \sum_{i=1}^n \sum_{t=0}^{\infty} \mathbb{E}\{\rho_t(i) [\gamma_t(i)]^2\} < \infty, \end{aligned}$$

which implies that  $\sum_{t=0}^{\infty} \mathbb{E}\{[\gamma_t(i_t)]^2 | \mathcal{G}_t\} < \infty$  w.p.1. Therefore, noting (38), we can use Proposition 7 to conclude that the sequence  $\{\|y_t - y^*\|_2^2\}$  converges w.p.1 and

$$\sum_{t=0}^{\infty} \langle y_t - y^*, P_t G_t [y_t - y^*] \rangle < \infty \quad \text{w.p.1.}$$

Then, we have  $\sum_{t=0}^{\infty} [\min_{i \in \mathcal{S}} \gamma_t(i)] \langle y_t - y^*, P_t [y_t - y^*] \rangle \leq \sum_{t=0}^{\infty} \langle y_t - y^*, P_t G_t [y_t - y^*] \rangle < \infty$  w.p.1. Therefore, (11) and (12) imply that there exists a subset of iterations  $\mathcal{T}$  such that the sequence  $\{y_t - y^*\}_{t \in \mathcal{T}}$  converges to 0 w.p.1. Since  $\{\|y_t - y^*\|_2^2\}$  converges w.p.1, the whole sequence  $\{y_t - y^*\}$  converges to 0 w.p.1.  $\square$

We now turn to Lemma 5. Letting  $v(0) = L$  and  $v(n+1) = U$ , the result of the projection  $\Pi^{L,U} \hat{y}$  is the optimal solution to the problem

$$\begin{aligned} \min \quad & \frac{1}{2} \sum_{i=1}^n [v(i) - \hat{y}(i)]^2 \\ \text{subject to} \quad & v(i) \leq v(i+1) \quad \text{for all } i \in \{0, \dots, n\}. \end{aligned} \quad (39)$$

Associating the nonnegative Lagrange multipliers  $\{\lambda(i) : i \in \{0, \dots, n\}\}$  with the constraints, the Karush-Kuhn-Tucker conditions for this problem are

$$\hat{y}(i) - \lambda(i) + \lambda(i-1) = v(i) \quad \text{for all } i \in \{1, \dots, n\} \quad (40)$$

$$\lambda(i) [v(i+1) - v(i)] = 0 \quad \text{for all } i \in \{0, \dots, n\}. \quad (41)$$

The following result is useful when proving Lemma 5.

**Lemma 8** *Assume that  $y \in \mathcal{P}^{L,U}$ . Fix  $i^* \in \mathcal{S}$  and let  $\hat{y} \in \mathbb{R}^n$  be obtained by*

$$\hat{y}(i) = \begin{cases} y(i) + \alpha [A - y(i)] & \text{if } i = i^* \\ y(i) & \text{otherwise,} \end{cases}$$

where  $A$  is a scalar and  $\alpha \in [0, 1]$ . Let  $v = \Pi^{L,U} \hat{y}$  be computed by solving problem (39) and  $\{\lambda(i) : i \in \{0, \dots, n\}\}$  be the corresponding optimal Lagrange multipliers. Then, one of the following cases holds.

- 1) Either we have  $\lambda(i) = 0$  for all  $i \in \{0, \dots, n\}$ .
- 2) Or there exist  $\kappa$  and  $\mu \in \{0, \dots, n\}$  with  $\kappa \leq \mu$  such that  $\lambda(i) > 0$  if and only if  $i \in \{\kappa, \dots, \mu\}$ .

**Proof of Lemma 8** To reach a contradiction, we assume that there exist  $\kappa_1, \mu_1, \kappa_2, \mu_2, \dots, \kappa_k$  and  $\mu_k \in \{0, \dots, n\}$  with  $k \geq 2$  such that  $\kappa_1 < \mu_1 + 1 < \kappa_2 < \mu_2 + 1 < \dots < \kappa_k < \mu_k + 1$  and  $\lambda(i) > 0$  if and only if  $i \in \{\kappa_1, \dots, \mu_1\} \cup \{\kappa_2, \dots, \mu_2\} \cup \dots \cup \{\kappa_k, \dots, \mu_k\}$ . We consider four cases.

Case 1 – Assume that  $\kappa_1 > 0$  and  $\mu_2 < n$ . Since  $\lambda(i) > 0$  for all  $i \in \{\kappa_1, \dots, \mu_1\}$ , (41) implies that  $v(\kappa_1) = v(\kappa_1 + 1) = \dots = v(\mu_1 + 1)$ . Since  $\lambda(\kappa_1) > 0$ ,  $\lambda(\mu_1) > 0$  and  $\lambda(\kappa_1 - 1) = \lambda(\mu_1 + 1) = 0$ , (40) implies that  $v(\kappa_1) = \hat{y}(\kappa_1) - \lambda(\kappa_1) < \hat{y}(\kappa_1)$  and  $v(\mu_1 + 1) = \hat{y}(\mu_1 + 1) + \lambda(\mu_1) > \hat{y}(\mu_1 + 1)$ . Therefore, we obtain,  $\hat{y}(\kappa_1) > v(\kappa_1) = v(\mu_1 + 1) > \hat{y}(\mu_1 + 1)$ . On the other hand, since  $y \in \mathcal{P}^{L,U}$ , we have  $y(\kappa_1) \leq y(\mu_1 + 1)$ . Therefore, since  $\hat{y}$  differs from  $y$  only in the  $i^*$ -th component, we must have  $i^* = \kappa_1$  or  $i^* = \mu_1 + 1$ . By using a similar

argument, we can obtain  $\hat{y}(\kappa_2) > \hat{y}(\mu_2 + 1)$ , which implies that we must also have  $i^* = \kappa_2$  or  $i^* = \mu_2 + 1$ . Since we cannot have both  $i^* \in \{\kappa_1, \mu_1 + 1\}$  and  $i^* \in \{\kappa_2, \mu_2 + 1\}$ , we reach a contradiction.

Case 2 – Assume that  $\kappa_1 = 0$  and  $\mu_2 < n$ . Since  $\lambda(i) > 0$  for all  $i \in \{0, \dots, \mu_1\}$  and  $v(0) = L$ , (41) implies that  $L = v(1) = v(2) = \dots = v(\mu_1 + 1)$ . Then, since  $\lambda(\mu_1) > 0$  and  $\lambda(\mu_1 + 1) = 0$ , (40) implies that  $L = v(\mu_1 + 1) = \hat{y}(\mu_1 + 1) + \lambda(\mu_1) > \hat{y}(\mu_1 + 1)$ . On the other hand, since  $y \in \mathcal{P}^{L,U}$ , we have  $y(\mu_1 + 1) \geq L$ . Therefore, since  $\hat{y}$  differs from  $y$  only in the  $i^*$ -th component, we must have  $i^* = \mu_1 + 1$ . Following an argument similar to the one in the previous case, we must also have  $i^* = \kappa_2$  or  $i^* = \mu_2 + 1$ . Since we cannot have both  $i^* = \mu_1 + 1$  and  $i^* \in \{\kappa_2, \mu_2 + 1\}$ , we reach a contradiction.

The cases where we have  $\kappa_1 > 0$  and  $\mu_2 = n$ , or  $\kappa_1 = 0$  and  $\mu_2 = n$  can be handled using similar arguments.  $\square$

We now prove Lemma 5.

**Proof of Lemma 5** Let  $v$  be computed by solving problem (39) and  $\{\lambda(i) : i \in \{0, \dots, n\}\}$  be the corresponding optimal Lagrange multipliers. We show that there exists  $\ell \in \mathcal{S}$  that satisfies (23)-(25). Before we begin, we note that  $v \in \mathcal{P}^{L,U}$  since  $v$  is a feasible solution to problem (39).

If  $\lambda(i) = 0$  for all  $i \in \{0, \dots, n\}$ , then (40) implies that  $v(i) = \hat{y}(i)$  for all  $i \in \{1, \dots, n\}$ . In this case, we set  $\ell = i^*$ . Since  $v \in \mathcal{P}^{L,U}$ , we have  $L \leq v(i^*) = \hat{y}(i^*) \leq U$ , which implies that  $v(i^*) = \hat{y}(i^*) = [\hat{y}(i^*) \wedge U] \vee L$ . Therefore, (23) is satisfied. Since  $\ell = i^*$ , (24) and (25) do not need to be shown.

We now assume that there exists at least one strictly positive Lagrange multiplier. Let  $\kappa$  and  $\mu$  with  $\kappa \leq \mu$  be such that  $\lambda(i) > 0$  if and only if  $i \in \{\kappa, \dots, \mu\}$ . The existence of such  $\kappa$  and  $\mu$  is guaranteed by Lemma 8. We consider four cases.

Case 1 – Assume that  $\kappa > 0$  and  $\mu < n$ . In this case, following an argument similar to the one in Case 1 in the proof of Lemma 8, we obtain  $v(\kappa) = v(\kappa + 1) = \dots = v(\mu + 1)$  and we must have  $i^* = \kappa$  or  $i^* = \mu + 1$ . By adding (40) for all  $i \in \{\kappa, \dots, \mu + 1\}$ , we obtain

$$v(\kappa) = v(\kappa + 1) = \dots = v(\mu + 1) = \frac{\hat{y}(\kappa) + \dots + \hat{y}(\mu + 1)}{\mu - \kappa + 2}. \quad (42)$$

Since  $\lambda(i) = 0$  for all  $i \notin \{\kappa, \dots, \mu\}$ , (40) implies that

$$v(i) = \hat{y}(i) \quad \text{for all } i \notin \{\kappa, \dots, \mu + 1\}. \quad (43)$$

Finally, since  $\lambda(\kappa) > 0$ ,  $\lambda(\mu) > 0$  and  $\lambda(\kappa - 1) = \lambda(\mu + 1) = 0$ , (40) implies that  $v(\kappa) = \hat{y}(\kappa) - \lambda(\kappa) < \hat{y}(\kappa)$  and  $v(\mu + 1) = \hat{y}(\mu + 1) + \lambda(\mu) > \hat{y}(\mu + 1)$ . Then, using (42), we obtain

$$\hat{y}(\mu + 1) < v(\mu + 1) = \frac{\hat{y}(\kappa) + \dots + \hat{y}(\mu + 1)}{\mu - \kappa + 2} = v(\kappa) < \hat{y}(\kappa). \quad (44)$$

Since we must have  $i^* = \kappa$  or  $i^* = \mu + 1$ , we consider the following two subcases.

Case 1.a – Assume that  $i^* = \kappa$ . In this case, we set  $\ell = \mu + 1$  and we have  $\ell > i^*$ . Since  $v \in \mathcal{P}^{L,U}$ , (42) implies that

$$v(i^*) = v(i^* + 1) = \dots = v(\ell) = \frac{\hat{y}(i^*) + \dots + \hat{y}(\ell)}{\ell - i^* + 1} \leq U,$$

from which we obtain

$$v(i) = \frac{\hat{y}(i^*) + \dots + \hat{y}(\ell)}{\ell - i^* + 1} \wedge U \quad \text{for all } i \in \{i^*, \dots, \ell\}.$$

By (43), we also have  $v(i) = \hat{y}(i)$  for all  $i \notin \{i^*, \dots, \ell\}$ . Therefore, (23) is satisfied. Since  $y \in \mathcal{P}^{L,U}$  and  $\hat{y}$  differs from  $y$  only in the  $i^*$ -th component, we have  $\hat{y}(i^* + 1) \leq \hat{y}(i^* + 2) \leq \dots \leq \hat{y}(\ell) = \hat{y}(\mu + 1)$ . Then, noting (44) shows that (24) is satisfied. Since  $\ell > i^*$ , (25) does not need to be shown.

Case 1.b – Assume that  $i^* = \mu + 1$ . In this case, we set  $\ell = \kappa$  and we have  $\ell < i^*$ . Since  $v \in \mathcal{P}^{L,U}$ , (42) implies that

$$v(\ell) = v(\ell + 1) = \dots = v(i^*) = \frac{\hat{y}(\ell) + \dots + \hat{y}(i^*)}{i^* - \ell + 1} \geq L,$$

from which we obtain

$$v(i) = \frac{\hat{y}(\ell) + \dots + \hat{y}(i^*)}{i^* - \ell + 1} \vee L \quad \text{for all } i \in \{\ell, \dots, i^*\}.$$

By (43), we also have  $v(i) = \hat{y}(i)$  for all  $i \notin \{\ell, \dots, i^*\}$ . Therefore, (23) is satisfied. Since  $y \in \mathcal{P}^{L,U}$  and  $\hat{y}$  differs from  $y$  only in the  $i^*$ -th component, we have  $\hat{y}(\kappa) = \hat{y}(\ell) \leq \hat{y}(\ell + 1) \leq \dots \leq \hat{y}(i^* - 1)$ . Then, noting (44) shows that (25) is satisfied. Since  $\ell < i^*$ , (24) does not need to be shown.

Case 2 – Assume that  $\kappa = 0$  and  $\mu < n$ . In this case, following an argument similar to the one in Case 2 in the proof of Lemma 8, we obtain  $L = v(1) = v(2) = \dots = v(\mu + 1)$ ,  $\hat{y}(\mu + 1) < L$  and we must have  $i^* = \mu + 1$ . By adding (40) for all  $i \in \{1, \dots, \mu + 1\}$ , we obtain

$$L = v(1) = v(2) = \dots = v(\mu + 1) = \frac{\hat{y}(1) + \dots + \hat{y}(\mu + 1) + \lambda(0)}{\mu + 1} > \frac{\hat{y}(1) + \dots + \hat{y}(\mu + 1)}{\mu + 1}. \quad (45)$$

Since  $\lambda(i) = 0$  for all  $i \notin \{0, \dots, \mu\}$ , (40) implies that

$$v(i) = \hat{y}(i) \quad \text{for all } i \notin \{1, \dots, \mu + 1\}. \quad (46)$$

Since we must have  $i^* = \mu + 1$ , we consider the following two subcases.

Case 2.a – Assume that  $\mu > 0$ . In this case, we have  $i^* > 1$ , we set  $\ell = 1$  and we obtain  $\ell < i^*$ . By (45), we have

$$v(i) = L = \frac{\hat{y}(\ell) + \dots + \hat{y}(i^*)}{i^* - \ell + 1} \vee L \quad \text{for all } i \in \{\ell, \dots, i^*\}.$$

By (46), we also have  $v(i) = \hat{y}(i)$  for all  $i \notin \{\ell, \dots, i^*\}$ . Therefore, (23) is satisfied. Since  $y \in \mathcal{P}^{L,U}$  and  $\hat{y}$  differs from  $y$  only in the  $i^*$ -th component, we have  $L \leq \hat{y}(\ell) \leq \hat{y}(\ell + 1) \leq \dots \leq \hat{y}(i^* - 1)$ . We also have  $\hat{y}(i^*) = \hat{y}(\mu + 1) < L$ . Therefore, we have  $\hat{y}(i^*) < \hat{y}(\ell) \leq \hat{y}(\ell + 1) \leq \dots \leq \hat{y}(i^* - 1)$ , which implies that  $\hat{y}(i^*) < [\hat{y}(\ell) + \dots + \hat{y}(i^*)]/[i^* - \ell + 1]$ . Noting (45), we obtain

$$\hat{y}(i^*) < \frac{\hat{y}(\ell) + \dots + \hat{y}(i^*)}{i^* - \ell + 1} < L \leq \hat{y}(\ell) \leq \dots \leq \hat{y}(i^* - 1),$$

which shows that (25) is satisfied. Since  $\ell < i^*$ , (24) does not need to be shown.

Case 2.b – Assume that  $\mu = 0$ . In this case, we have  $i^* = 1$ , we set  $\ell = 1$  and we obtain  $\ell = i^*$ . Since  $\hat{y}(1) = \hat{y}(\mu + 1) < L \leq U$ , (45) implies that  $v(i^*) = v(1) = L = [\hat{y}(1) \wedge U] \vee L = [\hat{y}(i^*) \wedge U] \vee L$ . By (46), we also have  $v(i) = \hat{y}(i)$  for all  $i \notin \{i^*\}$ . Therefore, (23) is satisfied. Since  $\ell = i^*$ , (24) and (25) do not need to be shown.

The cases where we have  $\kappa > 0$  and  $\mu = n$ , or  $\kappa = 0$  and  $\mu = n$  can be handled using similar arguments.  $\square$
